# Supplementary material for: Wide-Open: Accelerating public data release by automating detection of overdue datasets
Source: PLoS Biol. 2017 Jun 8;15(6):e2002477. doi: 10.1371/journal.pbio.2002477 (PMC5464523; doi:10.1371/journal.pbio.2002477)
Supplement: S1 Data — Obtained from https://www.ncbi.nlm.nih.gov/geo/summary/summary.cgi?type=history. (CSV) [file pbio.2002477.s001.csv]

	Year	Quarter	Series	Platforms	Samples
66	2000.75	3	0.0	1	0.002
65	2001.0	4	0.0	2	0.01
64	2001.25	1	0.001	4	0.048
63	2001.5	2	0.002	8	0.053
62	2001.75	3	0.009	14	0.545
61	2002.0	4	0.013	19	0.67
60	2002.25	1	0.033	77	1.187
59	2002.5	2	0.06	105	1.874
58	2002.75	3	0.079	111	2.103
57	2003.0	4	0.105	169	2.645
56	2003.25	1	0.188	201	3.972
55	2003.5	2	0.347	236	6.049
54	2003.75	3	0.471	279	7.498
53	2004.0	4	0.628	524	10.386
52	2004.25	1	0.844	617	14.936
51	2004.5	2	1.046	782	18.347
50	2004.75	3	1.229	858	23.12
49	2005.0	4	1.475	1,082	28.262
48	2005.25	1	1.763	1,196	33.986
47	2005.5	2	2.007	1,394	40.864
46	2005.75	3	2.388	1,649	50.232
45	2006.0	4	2.869	1,923	63.646
44	2006.25	1	3.362	2,134	75.585
43	2006.5	2	3.767	2,309	85.274
42	2006.75	3	4.228	2,660	99.814
41	2007.0	4	4.682	2,876	109.424
40	2007.25	1	5.32	3,217	131.416
39	2007.5	2	5.944	3,483	151.739
38	2007.75	3	6.621	3,795	167.918
37	2008.0	4	7.393	4,214	187.393
36	2008.25	1	8.224	4,458	210.813
35	2008.5	2	8.962	4,734	230.728
34	2008.75	3	9.713	4,982	249.472
33	2009.0	4	10.671	5,349	272.294
32	2009.25	1	11.6	5,633	292.874
31	2009.5	2	12.633	5,887	318.076
30	2009.75	3	13.74	6,285	353.913
29	2010.0	4	14.984	6,752	383.42
28	2010.25	1	16.298	7,126	418.421
27	2010.5	2	17.494	7,433	448.358
26	2010.75	3	18.929	7,811	479.877
25	2011.0	4	20.553	8,124	509.582
24	2011.25	1	22.051	8,495	541.931
23	2011.5	2	23.593	8,836	583.365
22	2011.75	3	25.187	9,264	625.517
21	2012.0	4	27.343	9,608	673.268
20	2012.25	1	29.115	9,925	717.976
19	2012.5	2	30.965	10,221	759.388
18	2012.75	3	32.85	10,548	807.438
17	2013.0	4	34.94	10,889	852.057
16	2013.25	1	37.077	11,306	899.23
15	2013.5	2	39.236	11,683	949.506
14	2013.75	3	41.758	12,062	1003.297
13	2014.0	4	44.103	12,377	1054.885
12	2014.25	1	46.337	12,741	1104.642
11	2014.5	2	48.537	13,070	1164.92
10	2014.75	3	50.99	13,406	1242.043
9	2015.0	4	53.628	13,756	1306.971
8	2015.25	1	56.029	14,085	1365.674
7	2015.5	2	58.636	14,698	1436.943
6	2015.75	3	61.194	14,984	1582.663
5	2016.0	4	64.1	15,281	1651.613
4	2016.25	1	67.136	15,636	1764.436
3	2016.5	2	70.728	16,026	1844.144
2	2016.75	3	73.596	16,417	1941.014
1	2017.0	4	77.738	16,734	2034.729
0	2017.25	1	80.985	16,936	2097.543
