# Supplementary material for: Wide-Open: Accelerating public data release by automating detection of overdue datasets
Source: PLoS Biol. 2017 Jun 8;15(6):e2002477. doi: 10.1371/journal.pbio.2002477 (PMC5464523; doi:10.1371/journal.pbio.2002477)
Supplement: S2 Data — Computed using Wide-Open extracted references, GEOmetadb and queries against GEO web interface as described in the paper. (CSV) [file pbio.2002477.s002.csv]

	date	overdue
0	2017-04-20	24
1	2017-04-17	24
2	2017-04-14	24
3	2017-04-11	24
4	2017-04-08	24
5	2017-04-05	24
6	2017-04-02	24
7	2017-03-30	24
8	2017-03-27	24
9	2017-03-24	24
10	2017-03-21	24
11	2017-03-18	24
12	2017-03-15	24
13	2017-03-12	24
14	2017-03-09	24
15	2017-03-06	70
16	2017-03-03	72
17	2017-02-28	73
18	2017-02-25	74
19	2017-02-22	72
20	2017-02-19	82
21	2017-02-16	79
22	2017-02-13	76
23	2017-02-10	166
24	2017-02-07	461
25	2017-02-04	477
26	2017-02-01	475
27	2017-01-29	480
28	2017-01-26	480
29	2017-01-23	483
30	2017-01-20	480
31	2017-01-17	469
32	2017-01-14	474
33	2017-01-11	468
34	2017-01-08	467
35	2017-01-05	465
36	2017-01-02	464
37	2016-12-30	492
38	2016-12-27	521
39	2016-12-24	523
40	2016-12-21	517
41	2016-12-18	527
42	2016-12-15	523
43	2016-12-12	519
44	2016-12-09	525
45	2016-12-06	522
46	2016-12-03	540
47	2016-11-30	535
48	2016-11-27	563
49	2016-11-24	559
50	2016-11-21	562
51	2016-11-18	575
52	2016-11-15	580
53	2016-11-12	591
54	2016-11-09	586
55	2016-11-06	594
56	2016-11-03	589
57	2016-10-31	578
58	2016-10-28	598
59	2016-10-25	587
60	2016-10-22	596
61	2016-10-19	590
62	2016-10-16	590
63	2016-10-13	582
64	2016-10-10	577
65	2016-10-07	587
66	2016-10-04	581
67	2016-10-01	589
68	2016-09-28	590
69	2016-09-25	587
70	2016-09-22	587
71	2016-09-19	578
72	2016-09-16	586
73	2016-09-13	585
74	2016-09-10	594
75	2016-09-07	582
76	2016-09-04	592
77	2016-09-01	580
78	2016-08-29	607
79	2016-08-26	613
80	2016-08-23	609
81	2016-08-20	606
82	2016-08-17	597
83	2016-08-14	597
84	2016-08-11	582
85	2016-08-08	567
86	2016-08-05	570
87	2016-08-02	561
88	2016-07-30	584
89	2016-07-27	580
90	2016-07-24	580
91	2016-07-21	582
92	2016-07-18	589
93	2016-07-15	587
94	2016-07-12	579
95	2016-07-09	587
96	2016-07-06	580
97	2016-07-03	569
98	2016-06-30	559
99	2016-06-27	581
100	2016-06-24	583
101	2016-06-21	582
102	2016-06-18	591
103	2016-06-15	577
104	2016-06-12	584
105	2016-06-09	572
106	2016-06-06	567
107	2016-06-03	571
108	2016-05-31	565
109	2016-05-28	585
110	2016-05-25	574
111	2016-05-22	571
112	2016-05-19	575
113	2016-05-16	569
114	2016-05-13	569
115	2016-05-10	561
116	2016-05-07	556
117	2016-05-04	550
118	2016-05-01	556
119	2016-04-28	562
120	2016-04-25	560
121	2016-04-22	560
122	2016-04-19	552
123	2016-04-16	556
124	2016-04-13	546
125	2016-04-10	541
126	2016-04-07	539
127	2016-04-04	540
128	2016-04-01	544
129	2016-03-29	543
130	2016-03-26	547
131	2016-03-23	533
132	2016-03-20	533
133	2016-03-17	525
134	2016-03-14	526
135	2016-03-11	528
136	2016-03-08	511
137	2016-03-05	513
138	2016-03-02	497
139	2016-02-28	509
140	2016-02-25	516
141	2016-02-22	515
142	2016-02-19	516
143	2016-02-16	504
144	2016-02-13	508
145	2016-02-10	489
146	2016-02-07	484
147	2016-02-04	474
148	2016-02-01	459
149	2016-01-29	477
150	2016-01-26	467
151	2016-01-23	473
152	2016-01-20	463
153	2016-01-17	476
154	2016-01-14	471
155	2016-01-11	459
156	2016-01-08	465
157	2016-01-05	443
158	2016-01-02	457
159	2015-12-30	489
160	2015-12-27	538
161	2015-12-24	541
162	2015-12-21	520
163	2015-12-18	539
164	2015-12-15	515
165	2015-12-12	522
166	2015-12-09	521
167	2015-12-06	533
168	2015-12-03	523
169	2015-11-30	507
170	2015-11-27	522
171	2015-11-24	515
172	2015-11-21	526
173	2015-11-18	525
174	2015-11-15	526
175	2015-11-12	513
176	2015-11-09	494
177	2015-11-06	492
178	2015-11-03	483
179	2015-10-31	490
180	2015-10-28	490
181	2015-10-25	482
182	2015-10-22	480
183	2015-10-19	466
184	2015-10-16	468
185	2015-10-13	472
186	2015-10-10	469
187	2015-10-07	457
188	2015-10-04	451
189	2015-10-01	446
190	2015-09-28	478
191	2015-09-25	482
192	2015-09-22	469
193	2015-09-19	470
194	2015-09-16	452
195	2015-09-13	446
196	2015-09-10	435
197	2015-09-07	432
198	2015-09-04	428
199	2015-09-01	434
200	2015-08-29	461
201	2015-08-26	450
202	2015-08-23	448
203	2015-08-20	441
204	2015-08-17	445
205	2015-08-14	434
206	2015-08-11	428
207	2015-08-08	434
208	2015-08-05	424
209	2015-08-02	428
210	2015-07-30	434
211	2015-07-27	431
212	2015-07-24	424
213	2015-07-21	414
214	2015-07-18	422
215	2015-07-15	414
216	2015-07-12	420
217	2015-07-09	413
218	2015-07-06	410
219	2015-07-03	416
220	2015-06-30	399
221	2015-06-27	436
222	2015-06-24	434
223	2015-06-21	442
224	2015-06-18	437
225	2015-06-15	438
226	2015-06-12	440
227	2015-06-09	436
228	2015-06-06	444
229	2015-06-03	431
230	2015-05-31	432
231	2015-05-28	439
232	2015-05-25	435
233	2015-05-22	435
234	2015-05-19	437
235	2015-05-16	454
236	2015-05-13	444
237	2015-05-10	446
238	2015-05-07	447
239	2015-05-04	445
240	2015-05-01	448
241	2015-04-28	452
242	2015-04-25	452
243	2015-04-22	449
244	2015-04-19	449
245	2015-04-16	447
246	2015-04-13	455
247	2015-04-10	447
248	2015-04-07	442
249	2015-04-04	453
250	2015-04-01	441
251	2015-03-29	466
252	2015-03-26	455
253	2015-03-23	442
254	2015-03-20	441
255	2015-03-17	438
256	2015-03-14	446
257	2015-03-11	443
258	2015-03-08	444
259	2015-03-05	439
260	2015-03-02	437
261	2015-02-27	454
262	2015-02-24	432
263	2015-02-21	438
264	2015-02-18	429
265	2015-02-15	436
266	2015-02-12	428
267	2015-02-09	419
268	2015-02-06	412
269	2015-02-03	406
270	2015-01-31	411
271	2015-01-28	412
272	2015-01-25	410
273	2015-01-22	408
274	2015-01-19	402
275	2015-01-16	408
276	2015-01-13	402
277	2015-01-10	402
278	2015-01-07	393
279	2015-01-04	410
280	2015-01-01	417
281	2014-12-29	491
282	2014-12-26	495
283	2014-12-23	489
284	2014-12-20	503
285	2014-12-17	485
286	2014-12-14	477
287	2014-12-11	471
288	2014-12-08	473
289	2014-12-05	462
290	2014-12-02	445
291	2014-11-29	483
292	2014-11-26	477
293	2014-11-23	470
294	2014-11-20	455
295	2014-11-17	443
296	2014-11-14	451
297	2014-11-11	452
298	2014-11-08	458
299	2014-11-05	446
300	2014-11-02	449
301	2014-10-30	456
302	2014-10-27	459
303	2014-10-24	459
304	2014-10-21	442
305	2014-10-18	452
306	2014-10-15	444
307	2014-10-12	438
308	2014-10-09	433
309	2014-10-06	424
310	2014-10-03	426
311	2014-09-30	426
312	2014-09-27	454
313	2014-09-24	441
314	2014-09-21	450
315	2014-09-18	444
316	2014-09-15	440
317	2014-09-12	437
318	2014-09-09	433
319	2014-09-06	440
320	2014-09-03	424
321	2014-08-31	429
322	2014-08-28	438
323	2014-08-25	431
324	2014-08-22	432
325	2014-08-19	420
326	2014-08-16	423
327	2014-08-13	409
328	2014-08-10	408
329	2014-08-07	403
330	2014-08-04	398
331	2014-08-01	406
332	2014-07-29	423
333	2014-07-26	438
334	2014-07-23	423
335	2014-07-20	417
336	2014-07-17	413
337	2014-07-14	409
338	2014-07-11	408
339	2014-07-08	404
340	2014-07-05	406
341	2014-07-02	389
342	2014-06-29	414
343	2014-06-26	420
344	2014-06-23	414
345	2014-06-20	427
346	2014-06-17	423
347	2014-06-14	426
348	2014-06-11	418
349	2014-06-08	421
350	2014-06-05	428
351	2014-06-02	427
352	2014-05-30	451
353	2014-05-27	432
354	2014-05-24	438
355	2014-05-21	427
356	2014-05-18	435
357	2014-05-15	425
358	2014-05-12	438
359	2014-05-09	443
360	2014-05-06	426
361	2014-05-03	431
362	2014-04-30	425
363	2014-04-27	435
364	2014-04-24	425
365	2014-04-21	423
366	2014-04-18	427
367	2014-04-15	419
368	2014-04-12	416
369	2014-04-09	409
370	2014-04-06	402
371	2014-04-03	403
372	2014-03-31	394
373	2014-03-28	405
374	2014-03-25	408
375	2014-03-22	408
376	2014-03-19	397
377	2014-03-16	397
378	2014-03-13	399
379	2014-03-10	396
380	2014-03-07	384
381	2014-03-04	377
382	2014-03-01	386
383	2014-02-26	382
384	2014-02-23	379
385	2014-02-20	366
386	2014-02-17	375
387	2014-02-14	374
388	2014-02-11	365
389	2014-02-08	366
390	2014-02-05	360
391	2014-02-02	378
392	2014-01-30	377
393	2014-01-27	370
394	2014-01-24	367
395	2014-01-21	363
396	2014-01-18	375
397	2014-01-15	365
398	2014-01-12	357
399	2014-01-09	352
400	2014-01-06	344
401	2014-01-03	351
402	2013-12-31	350
403	2013-12-28	425
404	2013-12-25	420
405	2013-12-22	422
406	2013-12-19	417
407	2013-12-16	420
408	2013-12-13	426
409	2013-12-10	413
410	2013-12-07	423
411	2013-12-04	420
412	2013-12-01	427
413	2013-11-28	441
414	2013-11-25	434
415	2013-11-22	435
416	2013-11-19	429
417	2013-11-16	443
418	2013-11-13	428
419	2013-11-10	429
420	2013-11-07	418
421	2013-11-04	408
422	2013-11-01	408
423	2013-10-29	400
424	2013-10-26	397
425	2013-10-23	384
426	2013-10-20	381
427	2013-10-17	376
428	2013-10-14	376
429	2013-10-11	368
430	2013-10-08	367
431	2013-10-05	364
432	2013-10-02	349
433	2013-09-29	353
434	2013-09-26	355
435	2013-09-23	353
436	2013-09-20	360
437	2013-09-17	354
438	2013-09-14	362
439	2013-09-11	355
440	2013-09-08	355
441	2013-09-05	352
442	2013-09-02	362
443	2013-08-30	371
444	2013-08-27	366
445	2013-08-24	374
446	2013-08-21	365
447	2013-08-18	368
448	2013-08-15	364
449	2013-08-12	353
450	2013-08-09	364
451	2013-08-06	352
452	2013-08-03	350
453	2013-07-31	348
454	2013-07-28	355
455	2013-07-25	350
456	2013-07-22	341
457	2013-07-19	352
458	2013-07-16	336
459	2013-07-13	339
460	2013-07-10	333
461	2013-07-07	336
462	2013-07-04	330
463	2013-07-01	326
464	2013-06-28	343
465	2013-06-25	334
466	2013-06-22	343
467	2013-06-19	336
468	2013-06-16	323
469	2013-06-13	321
470	2013-06-10	318
471	2013-06-07	314
472	2013-06-04	306
473	2013-06-01	310
474	2013-05-29	330
475	2013-05-26	325
476	2013-05-23	322
477	2013-05-20	326
478	2013-05-17	326
479	2013-05-14	319
480	2013-05-11	319
481	2013-05-08	309
482	2013-05-05	307
483	2013-05-02	303
484	2013-04-29	311
485	2013-04-26	311
486	2013-04-23	299
487	2013-04-20	308
488	2013-04-17	295
489	2013-04-14	291
490	2013-04-11	286
491	2013-04-08	281
492	2013-04-05	281
493	2013-04-02	279
494	2013-03-30	292
495	2013-03-27	291
496	2013-03-24	283
497	2013-03-21	275
498	2013-03-18	298
499	2013-03-15	296
500	2013-03-12	289
501	2013-03-09	289
502	2013-03-06	290
503	2013-03-03	277
504	2013-02-28	267
505	2013-02-25	276
506	2013-02-22	274
507	2013-02-19	264
508	2013-02-16	271
509	2013-02-13	263
510	2013-02-10	262
511	2013-02-07	261
512	2013-02-04	255
513	2013-02-01	260
514	2013-01-29	262
515	2013-01-26	268
516	2013-01-23	256
517	2013-01-20	257
518	2013-01-17	252
519	2013-01-14	242
520	2013-01-11	245
521	2013-01-08	247
522	2013-01-05	245
523	2013-01-02	236
524	2012-12-30	294
525	2012-12-27	320
526	2012-12-24	321
527	2012-12-21	322
528	2012-12-18	336
529	2012-12-15	339
530	2012-12-12	337
531	2012-12-09	342
532	2012-12-06	346
533	2012-12-03	352
534	2012-11-30	352
535	2012-11-27	372
536	2012-11-24	380
537	2012-11-21	362
538	2012-11-18	372
539	2012-11-15	364
540	2012-11-12	352
541	2012-11-09	347
542	2012-11-06	342
543	2012-11-03	346
544	2012-10-31	333
545	2012-10-28	332
546	2012-10-25	325
547	2012-10-22	331
548	2012-10-19	338
549	2012-10-16	330
550	2012-10-13	327
551	2012-10-10	317
552	2012-10-07	316
553	2012-10-04	308
554	2012-10-01	313
555	2012-09-28	334
556	2012-09-25	326
557	2012-09-22	330
558	2012-09-19	325
559	2012-09-16	321
560	2012-09-13	315
561	2012-09-10	310
562	2012-09-07	307
563	2012-09-04	304
564	2012-09-01	313
565	2012-08-29	303
566	2012-08-26	300
567	2012-08-23	302
568	2012-08-20	297
569	2012-08-17	295
570	2012-08-14	289
571	2012-08-11	293
572	2012-08-08	288
573	2012-08-05	295
574	2012-08-02	294
575	2012-07-30	295
576	2012-07-27	293
577	2012-07-24	290
578	2012-07-21	300
579	2012-07-18	294
580	2012-07-15	274
581	2012-07-12	272
582	2012-07-09	273
583	2012-07-06	282
584	2012-07-03	278
585	2012-06-30	275
586	2012-06-27	283
587	2012-06-24	287
588	2012-06-21	275
589	2012-06-18	270
590	2012-06-15	285
591	2012-06-12	283
592	2012-06-09	281
593	2012-06-06	275
594	2012-06-03	273
595	2012-05-31	264
596	2012-05-28	276
597	2012-05-25	278
598	2012-05-22	275
599	2012-05-19	284
600	2012-05-16	275
601	2012-05-13	279
602	2012-05-10	272
603	2012-05-07	274
604	2012-05-04	269
605	2012-05-01	261
606	2012-04-28	277
607	2012-04-25	270
608	2012-04-22	265
609	2012-04-19	263
610	2012-04-16	256
611	2012-04-13	258
612	2012-04-10	248
613	2012-04-07	251
614	2012-04-04	245
615	2012-04-01	253
616	2012-03-29	252
617	2012-03-26	241
618	2012-03-23	241
619	2012-03-20	220
620	2012-03-17	222
621	2012-03-14	221
622	2012-03-11	224
623	2012-03-08	225
624	2012-03-05	227
625	2012-03-02	231
626	2012-02-28	236
627	2012-02-25	234
628	2012-02-22	224
629	2012-02-19	226
630	2012-02-16	230
631	2012-02-13	232
632	2012-02-10	238
633	2012-02-07	220
634	2012-02-04	217
635	2012-02-01	212
636	2012-01-29	212
637	2012-01-26	208
638	2012-01-23	210
639	2012-01-20	214
640	2012-01-17	206
641	2012-01-14	213
642	2012-01-11	204
643	2012-01-08	206
644	2012-01-05	201
645	2012-01-02	205
646	2011-12-30	206
647	2011-12-27	235
648	2011-12-24	236
649	2011-12-21	235
650	2011-12-18	244
651	2011-12-15	237
652	2011-12-12	236
653	2011-12-09	240
654	2011-12-06	240
655	2011-12-03	248
656	2011-11-30	237
657	2011-11-27	254
658	2011-11-24	252
659	2011-11-21	249
660	2011-11-18	253
661	2011-11-15	243
662	2011-11-12	245
663	2011-11-09	240
664	2011-11-06	239
665	2011-11-03	234
666	2011-10-31	233
667	2011-10-28	249
668	2011-10-25	243
669	2011-10-22	249
670	2011-10-19	240
671	2011-10-16	242
672	2011-10-13	241
673	2011-10-10	237
674	2011-10-07	240
675	2011-10-04	237
676	2011-10-01	235
677	2011-09-28	232
678	2011-09-25	221
679	2011-09-22	217
680	2011-09-19	218
681	2011-09-16	221
682	2011-09-13	220
683	2011-09-10	219
684	2011-09-07	215
685	2011-09-04	212
686	2011-09-01	210
687	2011-08-29	216
688	2011-08-26	218
689	2011-08-23	213
690	2011-08-20	221
691	2011-08-17	219
692	2011-08-14	221
693	2011-08-11	219
694	2011-08-08	215
695	2011-08-05	215
696	2011-08-02	204
697	2011-07-30	210
698	2011-07-27	209
699	2011-07-24	209
700	2011-07-21	200
701	2011-07-18	191
702	2011-07-15	193
703	2011-07-12	190
704	2011-07-09	188
705	2011-07-06	186
706	2011-07-03	185
707	2011-06-30	177
708	2011-06-27	175
709	2011-06-24	177
710	2011-06-21	174
711	2011-06-18	178
712	2011-06-15	170
713	2011-06-12	173
714	2011-06-09	176
715	2011-06-06	171
716	2011-06-03	178
717	2011-05-31	175
718	2011-05-28	194
719	2011-05-25	183
720	2011-05-22	184
721	2011-05-19	180
722	2011-05-16	185
723	2011-05-13	183
724	2011-05-10	174
725	2011-05-07	173
726	2011-05-04	163
727	2011-05-01	164
728	2011-04-28	155
729	2011-04-25	154
730	2011-04-22	156
731	2011-04-19	145
732	2011-04-16	174
733	2011-04-13	173
734	2011-04-10	151
735	2011-04-07	152
736	2011-04-04	146
737	2011-04-01	147
738	2011-03-29	149
739	2011-03-26	156
740	2011-03-23	156
741	2011-03-20	158
742	2011-03-17	155
743	2011-03-14	153
744	2011-03-11	157
745	2011-03-08	146
746	2011-03-05	148
747	2011-03-02	145
748	2011-02-27	149
749	2011-02-24	143
750	2011-02-21	141
751	2011-02-18	135
752	2011-02-15	133
753	2011-02-12	137
754	2011-02-09	129
755	2011-02-06	132
756	2011-02-03	132
757	2011-01-31	132
758	2011-01-28	138
759	2011-01-25	133
760	2011-01-22	138
761	2011-01-19	137
762	2011-01-16	136
763	2011-01-13	134
764	2011-01-10	131
765	2011-01-07	130
766	2011-01-04	121
767	2011-01-01	125
768	2010-12-29	143
769	2010-12-26	144
770	2010-12-23	144
771	2010-12-20	139
772	2010-12-17	143
773	2010-12-14	137
774	2010-12-11	133
775	2010-12-08	133
776	2010-12-05	142
777	2010-12-02	146
778	2010-11-29	146
779	2010-11-26	152
780	2010-11-23	143
781	2010-11-20	145
782	2010-11-17	145
783	2010-11-14	146
784	2010-11-11	139
785	2010-11-08	138
786	2010-11-05	133
787	2010-11-02	134
788	2010-10-30	137
789	2010-10-27	133
790	2010-10-24	139
791	2010-10-21	146
792	2010-10-18	133
793	2010-10-15	136
794	2010-10-12	131
795	2010-10-09	136
796	2010-10-06	128
797	2010-10-03	130
798	2010-09-30	131
799	2010-09-27	138
800	2010-09-24	142
801	2010-09-21	132
802	2010-09-18	140
803	2010-09-15	136
804	2010-09-12	133
805	2010-09-09	129
806	2010-09-06	127
807	2010-09-03	128
808	2010-08-31	128
809	2010-08-28	135
810	2010-08-25	132
811	2010-08-22	135
812	2010-08-19	135
813	2010-08-16	137
814	2010-08-13	136
815	2010-08-10	132
816	2010-08-07	129
817	2010-08-04	128
818	2010-08-01	129
819	2010-07-29	129
820	2010-07-26	129
821	2010-07-23	128
822	2010-07-20	132
823	2010-07-17	136
824	2010-07-14	130
825	2010-07-11	128
826	2010-07-08	127
827	2010-07-05	130
828	2010-07-02	132
829	2010-06-29	133
830	2010-06-26	136
831	2010-06-23	129
832	2010-06-20	124
833	2010-06-17	127
834	2010-06-14	129
835	2010-06-11	130
836	2010-06-08	128
837	2010-06-05	133
838	2010-06-02	126
839	2010-05-30	129
840	2010-05-27	129
841	2010-05-24	121
842	2010-05-21	124
843	2010-05-18	121
844	2010-05-15	113
845	2010-05-12	105
846	2010-05-09	107
847	2010-05-06	103
848	2010-05-03	107
849	2010-04-30	107
850	2010-04-27	110
851	2010-04-24	111
852	2010-04-21	105
853	2010-04-18	101
854	2010-04-15	100
855	2010-04-12	102
856	2010-04-09	109
857	2010-04-06	106
858	2010-04-03	106
859	2010-03-31	93
860	2010-03-28	100
861	2010-03-25	99
862	2010-03-22	98
863	2010-03-19	103
864	2010-03-16	105
865	2010-03-13	105
866	2010-03-10	101
867	2010-03-07	99
868	2010-03-04	102
869	2010-03-01	103
870	2010-02-26	107
871	2010-02-23	104
872	2010-02-20	101
873	2010-02-17	98
874	2010-02-14	98
875	2010-02-11	99
876	2010-02-08	100
877	2010-02-05	100
878	2010-02-02	98
879	2010-01-30	99
880	2010-01-27	93
881	2010-01-24	94
882	2010-01-21	90
883	2010-01-18	87
884	2010-01-15	87
885	2010-01-12	85
886	2010-01-09	89
887	2010-01-06	85
888	2010-01-03	81
889	2009-12-31	82
890	2009-12-28	90
891	2009-12-25	89
892	2009-12-22	84
893	2009-12-19	86
894	2009-12-16	87
895	2009-12-13	85
896	2009-12-10	83
897	2009-12-07	87
898	2009-12-04	85
899	2009-12-01	73
900	2009-11-28	84
901	2009-11-25	77
902	2009-11-22	78
903	2009-11-19	74
904	2009-11-16	74
905	2009-11-13	75
906	2009-11-10	75
907	2009-11-07	76
908	2009-11-04	74
909	2009-11-01	75
910	2009-10-29	80
911	2009-10-26	80
912	2009-10-23	86
913	2009-10-20	82
914	2009-10-17	81
915	2009-10-14	77
916	2009-10-11	78
917	2009-10-08	74
918	2009-10-05	72
919	2009-10-02	70
920	2009-09-29	76
921	2009-09-26	75
922	2009-09-23	74
923	2009-09-20	78
924	2009-09-17	79
925	2009-09-14	73
926	2009-09-11	76
927	2009-09-08	74
928	2009-09-05	85
929	2009-09-02	76
930	2009-08-30	84
931	2009-08-27	84
932	2009-08-24	79
933	2009-08-21	78
934	2009-08-18	74
935	2009-08-15	77
936	2009-08-12	74
937	2009-08-09	70
938	2009-08-06	68
939	2009-08-03	64
940	2009-07-31	64
941	2009-07-28	66
942	2009-07-25	68
943	2009-07-22	65
944	2009-07-19	69
945	2009-07-16	69
946	2009-07-13	65
947	2009-07-10	63
948	2009-07-07	67
949	2009-07-04	67
950	2009-07-01	58
951	2009-06-28	59
952	2009-06-25	56
953	2009-06-22	63
954	2009-06-19	67
955	2009-06-16	46
956	2009-06-13	45
957	2009-06-10	46
958	2009-06-07	43
959	2009-06-04	44
960	2009-06-01	44
961	2009-05-29	50
962	2009-05-26	47
963	2009-05-23	46
964	2009-05-20	40
965	2009-05-17	43
966	2009-05-14	41
967	2009-05-11	39
968	2009-05-08	42
969	2009-05-05	36
970	2009-05-02	38
971	2009-04-29	44
972	2009-04-26	44
973	2009-04-23	44
974	2009-04-20	42
975	2009-04-17	39
976	2009-04-14	43
977	2009-04-11	44
978	2009-04-08	45
979	2009-04-05	44
980	2009-04-02	45
981	2009-03-30	44
982	2009-03-27	44
983	2009-03-24	43
984	2009-03-21	44
985	2009-03-18	42
986	2009-03-15	41
987	2009-03-12	41
988	2009-03-09	38
989	2009-03-06	36
990	2009-03-03	36
991	2009-02-28	37
992	2009-02-25	34
993	2009-02-22	34
994	2009-02-19	36
995	2009-02-16	42
996	2009-02-13	42
997	2009-02-10	42
998	2009-02-07	41
999	2009-02-04	39
1000	2009-02-01	38
1001	2009-01-29	42
1002	2009-01-26	45
1003	2009-01-23	45
1004	2009-01-20	46
1005	2009-01-17	46
1006	2009-01-14	49
1007	2009-01-11	50
1008	2009-01-08	48
1009	2009-01-05	44
1010	2009-01-02	45
1011	2008-12-30	43
1012	2008-12-27	43
1013	2008-12-24	43
1014	2008-12-21	40
1015	2008-12-18	40
1016	2008-12-15	41
1017	2008-12-12	43
1018	2008-12-09	44
1019	2008-12-06	45
1020	2008-12-03	42
1021	2008-11-30	40
1022	2008-11-27	40
1023	2008-11-24	39
1024	2008-11-21	40
1025	2008-11-18	43
1026	2008-11-15	44
1027	2008-11-12	44
1028	2008-11-09	44
1029	2008-11-06	46
1030	2008-11-03	42
1031	2008-10-31	46
1032	2008-10-28	51
1033	2008-10-25	50
1034	2008-10-22	50
1035	2008-10-19	45
1036	2008-10-16	43
1037	2008-10-13	42
1038	2008-10-10	40
1039	2008-10-07	41
1040	2008-10-04	42
1041	2008-10-01	41
1042	2008-09-28	44
1043	2008-09-25	44
1044	2008-09-22	45
1045	2008-09-19	45
1046	2008-09-16	44
1047	2008-09-13	44
1048	2008-09-10	40
1049	2008-09-07	40
1050	2008-09-04	41
1051	2008-09-01	41
1052	2008-08-29	47
1053	2008-08-26	47
1054	2008-08-23	47
1055	2008-08-20	45
1056	2008-08-17	46
1057	2008-08-14	46
1058	2008-08-11	43
1059	2008-08-08	42
1060	2008-08-05	43
1061	2008-08-02	43
1062	2008-07-30	41
1063	2008-07-27	43
1064	2008-07-24	42
1065	2008-07-21	41
1066	2008-07-18	40
1067	2008-07-15	39
1068	2008-07-12	41
1069	2008-07-09	39
1070	2008-07-06	35
1071	2008-07-03	35
1072	2008-06-30	35
1073	2008-06-27	36
1074	2008-06-24	34
1075	2008-06-21	37
1076	2008-06-18	34
1077	2008-06-15	36
1078	2008-06-12	36
1079	2008-06-09	34
1080	2008-06-06	36
1081	2008-06-03	33
1082	2008-05-31	28
1083	2008-05-28	27
1084	2008-05-25	29
1085	2008-05-22	26
1086	2008-05-19	23
1087	2008-05-16	23
1088	2008-05-13	23
1089	2008-05-10	24
1090	2008-05-07	24
1091	2008-05-04	26
1092	2008-05-01	26
1093	2008-04-28	24
1094	2008-04-25	25
1095	2008-04-22	26
1096	2008-04-19	27
1097	2008-04-16	27
1098	2008-04-13	27
1099	2008-04-10	27
1100	2008-04-07	27
1101	2008-04-04	28
1102	2008-04-01	27
1103	2008-03-29	27
1104	2008-03-26	24
1105	2008-03-23	26
1106	2008-03-20	25
1107	2008-03-17	23
1108	2008-03-14	23
1109	2008-03-11	21
1110	2008-03-08	20
1111	2008-03-05	20
1112	2008-03-02	21
1113	2008-02-28	22
1114	2008-02-25	24
1115	2008-02-22	24
1116	2008-02-19	24
1117	2008-02-16	29
1118	2008-02-13	28
1119	2008-02-10	28
1120	2008-02-07	28
1121	2008-02-04	26
1122	2008-02-01	26
1123	2008-01-29	25
1124	2008-01-26	28
1125	2008-01-23	24
1126	2008-01-20	25
1127	2008-01-17	24
1128	2008-01-14	25
1129	2008-01-11	26
1130	2008-01-08	24
1131	2008-01-05	25
1132	2008-01-02	24
