# Supplementary material for: Wide-Open: Accelerating public data release by automating detection of overdue datasets
Source: PLoS Biol. 2017 Jun 8;15(6):e2002477. doi: 10.1371/journal.pbio.2002477 (PMC5464523; doi:10.1371/journal.pbio.2002477)
Supplement: S3 Data — Computed using data from GEOmetadb. (CSV) [file pbio.2002477.s003.csv]

	date	lag
0	2004-06-29	56.1652173913
1	2004-12-26	72.6117647059
2	2005-06-24	69.7341040462
3	2005-12-21	111.037414966
4	2006-06-19	88.504398827
5	2006-12-16	95.6855524079
6	2007-06-14	125.292279412
7	2007-12-11	135.607350097
8	2008-06-08	143.0
9	2008-12-05	156.470414201
10	2009-06-03	156.034076016
11	2009-11-30	171.098493627
12	2010-05-29	172.613786591
13	2010-11-25	157.289449113
14	2011-05-24	174.305374593
15	2011-11-20	166.512012012
16	2012-05-18	192.097195042
17	2012-11-14	205.983013294
18	2013-05-13	227.843652283
19	2013-11-09	201.668229777
20	2014-05-08	216.739680793
21	2014-11-04	216.122273249
22	2015-05-03	229.623363545
23	2015-10-30	221.529066667
24	2016-04-27	254.304562947
25	2016-10-24	268.268824771
